# Supplementary material for: Serotonin drives the acquisition of a profibrotic and anti-inflammatory gene profile through the 5-HT7R-PKA signaling axis
Source: PubMed Central journal article supplement (PMC5676747; doi:10.1038/s41598-017-15348-y), 2017-11-07
Supplement: 41598_2017_15348_MOESM1_ESM.pdf [file 41598_2017_15348_MOESM1_ESM.pdf]

**Serotonin drives the acquisition of a profibrotic and anti-inflammatory gene profile through the 5-HT7R-PKA signaling axis**

**Ángeles Domínguez-Soto<sup>\*</sup>, Alicia Usategui , Mateo de las Casas-Engel , Miriam Simón-Fuentes, Concha Nieto , Víctor D. Cuevas , Miguel A. Vega , José Luis Pablos , and Ángel L. Corbí.**

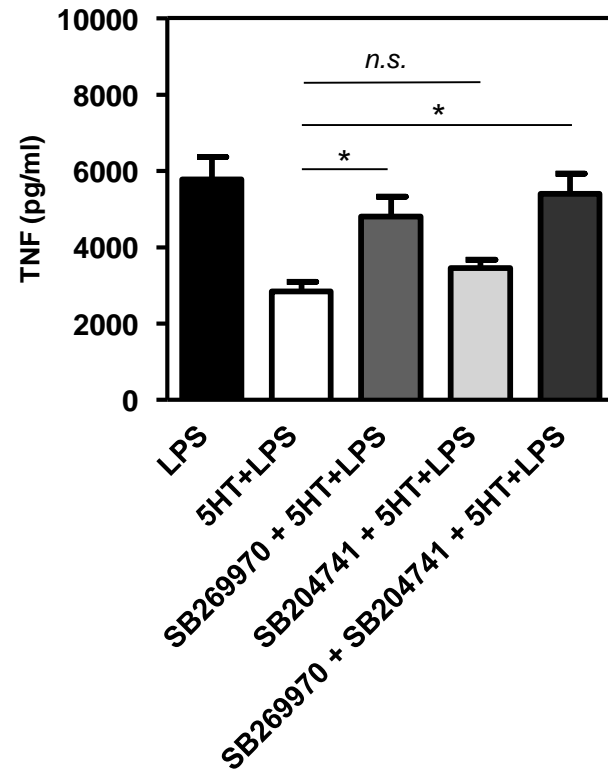

Supplementary Figure 1

| <b>Upregulated</b>             | <b>FDR q-val</b> |
|--------------------------------|------------------|
| Hallmark Angiogenesis          | 0.129            |
| Hallmark Hypoxia               | 0.2              |
| Hallmark Inflammatory response | 0.216            |
| Hallmark DNA repair            | 0.228            |
| Hallmark Glycolysis            | 0.238            |

| <b>Downregulated</b>               | <b>FDR q-val</b> |
|------------------------------------|------------------|
| Hallmark Cholesterol homeostasis   | 0.0              |
| Hallmark Fatty Acid metabolism     | 0.012            |
| Hallmark Androgen response         | 0.015            |
| Hallmark Oxydative phosphorylation | 0.018            |
| Hallmark mTORC1 signaling          | 0.103            |
| Hallmark Myc targets               | 0.103            |
| Hallmark Estrogen Response late    | 0.112            |

**Supplementary Figure 2**

**A**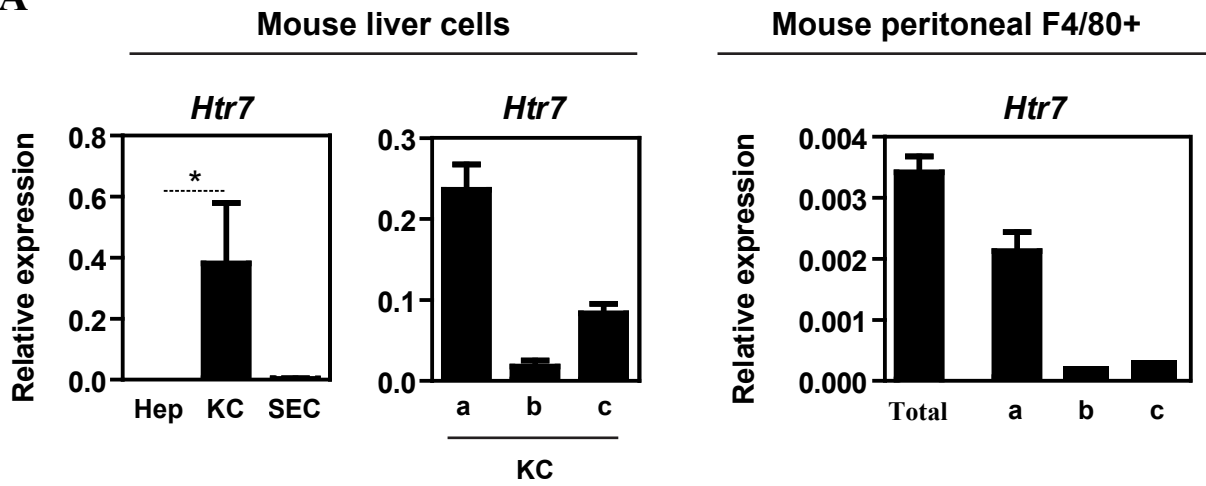**B**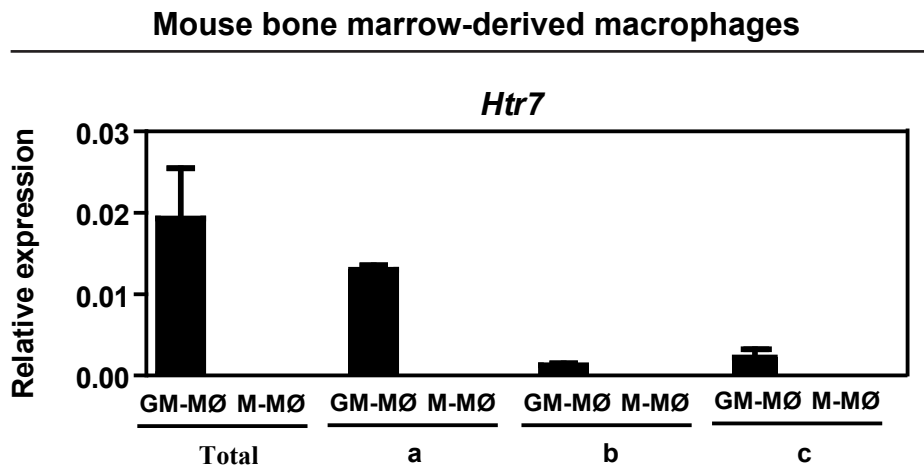**C**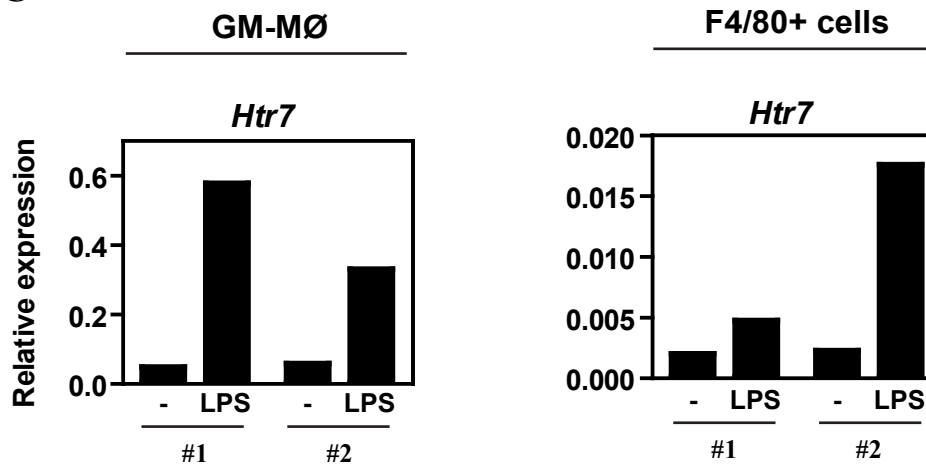**Supplementary Figure 3**

Supplementary Table I

| probeid       | M-MØ    | M-MØ+5HT | log2.fold<br>M-MØ+5HT/M-MØ | t       | pval       | adj.pval | genesymbol |
|---------------|---------|----------|----------------------------|---------|------------|----------|------------|
| A_23_P401106  | 154.79  | 2069.16  | 3.68                       | 14.6249 | 0          | 0.192    | PDE2A      |
| A_23_P19333   | 80.05   | 344.74   | 2.08                       | 16.5371 | 0          | 0.192    | TREM1      |
| A_24_P349547  | 218.04  | 750.66   | 1.97                       | 9.8847  | 2.0000E-04 | 0.2138   |            |
| A_33_P3322288 | 101.13  | 372.80   | 1.95                       | 9.6901  | 2.0000E-04 | 0.2138   | AZI2       |
| A_23_P68031   | 99.87   | 385.92   | 1.92                       | 5.8015  | 0.0024     | 0.2918   | STAT4      |
| A_23_P359245  | 36.35   | 139.40   | 1.78                       | 4.6261  | 0.0062     | 0.3294   | MET        |
| A_33_P3262694 | 146.55  | 434.36   | 1.76                       | 6.2628  | 0.0017     | 0.2733   |            |
| A_33_P3236267 | 228.15  | 690.87   | 1.74                       | 6.4271  | 0.0015     | 0.2733   | KCNQ1OT1   |
| A_23_P76969   | 785.27  | 2508.70  | 1.60                       | 7.4097  | 8.0000E-04 | 0.2392   | SIPA1L1    |
| A_23_P132515  | 102.95  | 300.13   | 1.55                       | 12.9583 | 1.0000E-04 | 0.2092   | SIDT1      |
| A_23_P170453  | 4108.14 | 10205.73 | 1.49                       | 7.968   | 6.0000E-04 | 0.2193   | CST5       |
| A_33_P3257150 | 930.53  | 2405.95  | 1.45                       | 5.6793  | 0.0026     | 0.3013   | CDC42      |
| A_24_P179013  | 29.76   | 82.16    | 1.44                       | 4.446   | 0.0072     | 0.3315   |            |
| A_33_P3372727 | 54.20   | 141.80   | 1.44                       | 6.8087  | 0.0012     | 0.2668   | SEMA5A     |
| A_23_P416711  | 51.15   | 137.60   | 1.44                       | 14.5716 | 0          | 0.192    | ST6GALNAC3 |
| A_23_P41344   | 22.46   | 64.52    | 1.43                       | 4.6314  | 0.0061     | 0.3294   | EREG       |
| A_33_P3422294 | 101.01  | 288.34   | 1.42                       | 7.6364  | 7.0000E-04 | 0.2392   |            |
| A_24_P245379  | 51.84   | 148.73   | 1.41                       | 8.8935  | 3.0000E-04 | 0.2138   | SERPINB2   |
| A_23_P201979  | 541.13  | 1528.58  | 1.40                       | 4.4274  | 0.0074     | 0.3315   | CREM       |
| A_23_P208900  | 275.45  | 686.62   | 1.33                       | 14.3717 | 0          | 0.192    | SEMA6B     |
| A_23_P428129  | 407.37  | 1022.43  | 1.32                       | 8.6251  | 4.0000E-04 | 0.2138   | CDKN1C     |
| A_33_P3317431 | 1153.70 | 2714.24  | 1.31                       | 7.5237  | 8.0000E-04 | 0.2392   |            |
| A_23_P72117   | 446.16  | 1126.78  | 1.30                       | 8.8485  | 4.0000E-04 | 0.2138   | SMPDL3A    |
| A_23_P102731  | 127.71  | 316.19   | 1.28                       | 8.6233  | 4.0000E-04 | 0.2138   | SMOX       |
| A_23_P85453   | 45.04   | 102.33   | 1.26                       | 10.2964 | 2.0000E-04 | 0.2138   | CD244      |
| A_24_P32085   | 269.48  | 651.45   | 1.26                       | 10.2497 | 2.0000E-04 | 0.2138   | MOB3B      |
| A_33_P3294133 | 870.49  | 1877.56  | 1.25                       | 5.9258  | 0.0022     | 0.2918   | EIF4B      |
| A_23_P32404   | 410.56  | 963.29   | 1.24                       | 13.1219 | 1.0000E-04 | 0.2092   | ISG20      |
| A_23_P145529  | 31.66   | 75.46    | 1.20                       | 6.385   | 0.0016     | 0.2733   | PKIB       |
| A_33_P3308115 | 990.35  | 1966.88  | 1.18                       | 5.2919  | 0.0035     | 0.311    |            |
| A_23_P257649  | 331.87  | 745.56   | 1.18                       | 12.2964 | 1.0000E-04 | 0.2138   | RBP1       |
| A_23_P154605  | 3414.30 | 7447.51  | 1.16                       | 10.6682 | 2.0000E-04 | 0.2138   | SULF2      |
| A_24_P49260   | 120.84  | 254.30   | 1.14                       | 11.5085 | 1.0000E-04 | 0.2138   | SPTLC3     |
| A_23_P419714  | 19.58   | 42.63    | 1.14                       | 9.2799  | 3.0000E-04 | 0.2138   | BTBD11     |
| A_24_P677642  | 30.48   | 61.09    | 1.14                       | 5.2716  | 0.0036     | 0.311    | FLJ31813   |
| A_33_P3407230 | 27.08   | 57.92    | 1.13                       | 5.0078  | 0.0044     | 0.3173   |            |
| A_23_P404481  | 116.49  | 243.45   | 1.11                       | 8.5894  | 4.0000E-04 | 0.2138   | S1PR1      |
| A_33_P3258977 | 35.31   | 72.61    | 1.11                       | 8.2306  | 5.0000E-04 | 0.2193   | CLEC4D     |
| A_33_P3333436 | 78.19   | 169.81   | 1.10                       | 9.9911  | 2.0000E-04 | 0.2138   | SGSM3      |
| A_23_P373724  | 55.60   | 115.94   | 1.10                       | 11.7738 | 1.0000E-04 | 0.2138   | PPFIBP1    |
| A_33_P3323722 | 2078.85 | 4415.23  | 1.10                       | 7.9589  | 6.0000E-04 | 0.2193   | ARL4C      |
| A_23_P79518   | 166.63  | 375.23   | 1.10                       | 7.111   | 0.001      | 0.2435   | IL1B       |
| A_24_P23245   | 1433.40 | 2910.16  | 1.10                       | 5.095   | 0.0041     | 0.3145   | NDUFA6     |
| A_33_P3412716 | 154.06  | 380.19   | 1.08                       | 5.0541  | 0.0043     | 0.3168   |            |
| A_23_P25503   | 2952.57 | 6154.31  | 1.06                       | 8.4164  | 5.0000E-04 | 0.2138   | FNDC3A     |
| A_33_P3382560 | 7622.06 | 15383.62 | 1.06                       | 8.424   | 4.0000E-04 | 0.2138   | RPL23A     |
| A_24_P759477  | 36.54   | 77.03    | 1.05                       | 8.6302  | 4.0000E-04 | 0.2138   | ITGB8      |
| A_33_P3229390 | 496.15  | 987.05   | 1.05                       | 5.6149  | 0.0027     | 0.3038   |            |
| A_33_P3275055 | 18.28   | 36.20    | 1.03                       | 6.2679  | 0.0017     | 0.2733   | ST6GALNAC3 |

|               |          |          |      |         |            |        |          |
|---------------|----------|----------|------|---------|------------|--------|----------|
| A_24_P291826  | 173.38   | 346.79   | 1.02 | 5.8185  | 0.0023     | 0.2918 | SYTL3    |
| A_32_P4985    | 21.76    | 43.44    | 1.01 | 5.5752  | 0.0028     | 0.3038 | CAMTA1   |
| A_33_P3273885 | 409.11   | 870.16   | 1.01 | 7.9645  | 6.0000E-04 | 0.2193 |          |
| A_32_P84605   | 14673.78 | 28072.13 | 1.00 | 4.8911  | 0.0049     | 0.3196 | RPS23    |
| A_33_P3319905 | 23.59    | 46.75    | 0.99 | 10.9177 | 1.0000E-04 | 0.2138 | TREM1    |
| A_33_P3366053 | 276.73   | 534.19   | 0.99 | 5.9429  | 0.0021     | 0.2918 | ADPRH    |
| A_33_P3395314 | 647.87   | 1272.55  | 0.99 | 5.3382  | 0.0034     | 0.3095 |          |
| A_23_P144959  | 43.39    | 85.50    | 0.98 | 10.5655 | 2.0000E-04 | 0.2138 | VCAN     |
| A_23_P166297  | 227.26   | 450.70   | 0.98 | 8.6544  | 4.0000E-04 | 0.2138 | ABCG1    |
| A_23_P74278   | 162.12   | 299.62   | 0.98 | 4.4996  | 0.0069     | 0.3315 | PDE4B    |
| A_32_P117464  | 190.00   | 365.73   | 0.97 | 7.6492  | 7.0000E-04 | 0.2392 | MB21D2   |
| A_23_P251075  | 111.82   | 212.26   | 0.97 | 4.835   | 0.0051     | 0.3231 | MAMLD1   |
| A_23_P414654  | 56.39    | 113.19   | 0.96 | 8.9112  | 3.0000E-04 | 0.2138 | RAB37    |
| A_23_P23438   | 741.59   | 1400.56  | 0.96 | 7.4906  | 8.0000E-04 | 0.2392 | SEMA4A   |
| A_24_P62505   | 31.16    | 59.65    | 0.96 | 4.9374  | 0.0047     | 0.3196 | COLGALT2 |
| A_23_P59637   | 957.90   | 1874.73  | 0.96 | 7.9163  | 6.0000E-04 | 0.2193 | DOCK4    |
| A_24_P296508  | 702.06   | 1395.79  | 0.95 | 8.7928  | 4.0000E-04 | 0.2138 | SLC43A2  |
| A_24_P381604  | 1672.70  | 2917.42  | 0.95 | 5.128   | 0.004      | 0.3145 | ITM2B    |
| A_23_P321354  | 389.53   | 744.31   | 0.95 | 10.037  | 2.0000E-04 | 0.2138 | TMEM71   |
| A_24_P270460  | 30.36    | 63.95    | 0.94 | 6.9762  | 0.0011     | 0.2531 | IFI27    |
| A_23_P60565   | 62.44    | 113.57   | 0.94 | 5.3352  | 0.0034     | 0.3095 | ZNF354A  |
| A_24_P132383  | 491.79   | 927.06   | 0.94 | 9.3149  | 3.0000E-04 | 0.2138 | GIMAP8   |
| A_33_P3352578 | 74.65    | 140.30   | 0.93 | 10.043  | 2.0000E-04 | 0.2138 | CLEC4D   |
| A_23_P39550   | 38.95    | 68.20    | 0.92 | 4.7259  | 0.0056     | 0.3294 | TMEM163  |
| A_23_P571     | 246.24   | 421.15   | 0.91 | 4.9355  | 0.0047     | 0.3196 | SLC2A1   |
| A_33_P3413840 | 121.69   | 228.70   | 0.91 | 6.8214  | 0.0012     | 0.2668 | GK       |
| A_33_P3273919 | 33.02    | 62.25    | 0.90 | 5.8288  | 0.0023     | 0.2918 | RNF212   |
| A_23_P91850   | 27.53    | 52.53    | 0.90 | 5.0045  | 0.0044     | 0.3173 | IL20RB   |
| A_23_P31858   | 98.63    | 174.64   | 0.90 | 4.9561  | 0.0046     | 0.3196 | ST18     |
| A_33_P3240843 | 170.64   | 314.95   | 0.88 | 8.4384  | 4.0000E-04 | 0.2138 | TMEM71   |
| A_23_P214139  | 349.66   | 647.84   | 0.88 | 7.2258  | 9.0000E-04 | 0.2392 | REV3L    |
| A_23_P69109   | 1470.47  | 2684.51  | 0.87 | 9.957   | 2.0000E-04 | 0.2138 | PLSCR1   |
| A_32_P161762  | 69.56    | 124.60   | 0.87 | 8.7471  | 4.0000E-04 | 0.2138 | RUNX2    |
| A_23_P208334  | 48.63    | 87.49    | 0.87 | 7.2443  | 9.0000E-04 | 0.2392 | PDE4A    |
| A_23_P68601   | 54.52    | 97.95    | 0.87 | 6.3335  | 0.0016     | 0.2733 | CST7     |
| A_33_P3375934 | 679.07   | 1219.59  | 0.86 | 5.0331  | 0.0043     | 0.3173 | NAMPT    |
| A_23_P81760   | 25.62    | 45.18    | 0.86 | 6.4934  | 0.0014     | 0.2733 | QKI      |
| A_33_P3389653 | 22.84    | 39.46    | 0.85 | 4.6774  | 0.0059     | 0.3294 | PDE4D    |
| A_23_P167920  | 117.43   | 211.91   | 0.85 | 7.7999  | 6.0000E-04 | 0.2296 | DLL1     |
| A_23_P66432   | 239.80   | 437.52   | 0.85 | 5.49    | 0.003      | 0.3082 | TTYH2    |
| A_23_P425502  | 53.16    | 94.05    | 0.84 | 6.4028  | 0.0015     | 0.2733 | DONSON   |
| A_23_P24077   | 2990.99  | 5175.59  | 0.84 | 6.2178  | 0.0018     | 0.2772 | C10orf54 |
| A_24_P315184  | 9659.77  | 16932.61 | 0.83 | 7.7041  | 7.0000E-04 | 0.2387 | NBEAL1   |
| A_23_P115011  | 59.66    | 102.35   | 0.83 | 7.3499  | 8.0000E-04 | 0.2392 | ADAMTSL4 |
| A_33_P3259557 | 296.93   | 544.75   | 0.83 | 7.1249  | 0.001      | 0.2435 | TMEM198B |
| A_33_P3279456 | 1040.31  | 1927.41  | 0.82 | 5.8947  | 0.0022     | 0.2918 |          |
| A_23_P55356   | 279.95   | 489.77   | 0.82 | 7.2414  | 9.0000E-04 | 0.2392 | VMO1     |
| A_24_P93703   | 371.19   | 656.60   | 0.82 | 8.9764  | 3.0000E-04 | 0.2138 | TMEM198B |
| A_24_P141332  | 475.35   | 791.34   | 0.82 | 4.2302  | 0.0088     | 0.3318 | CAMK2G   |
| A_23_P55649   | 43.70    | 76.22    | 0.81 | 7.4754  | 8.0000E-04 | 0.2392 | FPR2     |
| A_33_P3287348 | 460.32   | 754.77   | 0.81 | 5.3999  | 0.0032     | 0.3095 | CHN2     |
| A_24_P417606  | 8592.71  | 14024.86 | 0.81 | 4.3835  | 0.0077     | 0.3318 |          |
| A_23_P110445  | 129.59   | 225.31   | 0.81 | 7.5107  | 8.0000E-04 | 0.2392 | APBB3    |

|               |          |          |      |        |            |        |          |
|---------------|----------|----------|------|--------|------------|--------|----------|
| A_23_P400378  | 512.19   | 844.84   | 0.81 | 6.8421 | 0.0011     | 0.2668 | GPBAR1   |
| A_33_P3559138 | 690.61   | 1148.55  | 0.81 | 5.3174 | 0.0034     | 0.3095 |          |
| A_24_P413126  | 50.01    | 87.03    | 0.80 | 7.4007 | 8.0000E-04 | 0.2392 | PMEP1    |
| A_23_P38795   | 1232.70  | 2077.44  | 0.80 | 6.7376 | 0.0012     | 0.2692 | FPR1     |
| A_33_P3226050 | 548.01   | 953.06   | 0.80 | 8.4776 | 4.0000E-04 | 0.2138 | GATSL3   |
| A_23_P91390   | 1169.22  | 2064.74  | 0.80 | 5.3811 | 0.0033     | 0.3095 | THBD     |
| A_23_P201747  | 114.55   | 205.24   | 0.79 | 6.4307 | 0.0015     | 0.2733 | PADI2    |
| A_33_P3232557 | 119.84   | 206.66   | 0.78 | 6.5667 | 0.0014     | 0.2733 | DLGAP3   |
| A_33_P3415191 | 182.14   | 313.76   | 0.78 | 6.6105 | 0.0013     | 0.2733 | ATP8B1   |
| A_24_P324674  | 492.95   | 846.92   | 0.78 | 8.9556 | 3.0000E-04 | 0.2138 | LY9      |
| A_23_P86653   | 11484.56 | 19458.03 | 0.77 | 8.3019 | 5.0000E-04 | 0.2193 | SRGN     |
| A_23_P15108   | 532.44   | 913.10   | 0.77 | 8.1222 | 5.0000E-04 | 0.2193 | YPEL3    |
| A_23_P89570   | 551.51   | 948.42   | 0.76 | 8.0314 | 6.0000E-04 | 0.2193 | ZMYND15  |
| A_33_P3353259 | 19313.92 | 31984.65 | 0.76 | 5.2107 | 0.0038     | 0.3134 |          |
| A_33_P3238685 | 85.84    | 142.42   | 0.76 | 4.8244 | 0.0052     | 0.3237 | TET2     |
| A_24_P397817  | 26.80    | 49.85    | 0.76 | 4.5795 | 0.0064     | 0.3315 | LEP      |
| A_23_P210253  | 455.64   | 781.74   | 0.76 | 5.7366 | 0.0025     | 0.298  | DGKD     |
| A_33_P3421695 | 672.37   | 1171.67  | 0.76 | 4.1928 | 0.0091     | 0.3318 | CTNNB1   |
| A_24_P33156   | 80.86    | 135.90   | 0.75 | 4.889  | 0.0049     | 0.3196 | AFMID    |
| A_23_P10559   | 264.88   | 447.64   | 0.75 | 8.4521 | 4.0000E-04 | 0.2138 | AATK     |
| A_23_P152791  | 163.03   | 270.51   | 0.75 | 6.851  | 0.0011     | 0.2668 | SLC16A6  |
| A_23_P37375   | 217.10   | 359.90   | 0.74 | 8.0574 | 5.0000E-04 | 0.2193 | RPS6KA5  |
| A_23_P380998  | 165.10   | 269.18   | 0.74 | 6.4024 | 0.0015     | 0.2733 | R3HDM1   |
| A_33_P3227716 | 820.46   | 1369.66  | 0.73 | 7.4591 | 8.0000E-04 | 0.2392 | GATSL3   |
| A_24_P189739  | 38.88    | 64.36    | 0.73 | 4.5853 | 0.0064     | 0.3315 | DUSP16   |
| A_23_P154849  | 87.31    | 145.08   | 0.73 | 7.9088 | 6.0000E-04 | 0.2193 | OLIG1    |
| A_23_P258108  | 11895.64 | 19363.83 | 0.73 | 6.3718 | 0.0016     | 0.2733 |          |
| A_33_P3294524 | 90.88    | 148.39   | 0.72 | 5.3412 | 0.0034     | 0.3095 | ANKRD12  |
| A_23_P42116   | 264.29   | 453.39   | 0.72 | 4.936  | 0.0047     | 0.3196 | PPT2     |
| A_24_P58620   | 89.92    | 144.32   | 0.72 | 4.1773 | 0.0093     | 0.3318 | GRAMD1B  |
| A_24_P370172  | 236.53   | 391.70   | 0.72 | 7.0777 | 0.001      | 0.2457 | LILRA5   |
| A_23_P53588   | 24.99    | 41.18    | 0.72 | 5.2053 | 0.0038     | 0.3134 | WNT5B    |
| A_33_P3390708 | 37.54    | 64.61    | 0.72 | 4.439  | 0.0073     | 0.3315 | TMEM2    |
| A_33_P3242623 | 865.18   | 1305.65  | 0.72 | 4.3188 | 0.0081     | 0.3318 | SLC7A11  |
| A_32_P222961  | 30.14    | 49.40    | 0.72 | 7.198  | 9.0000E-04 | 0.2392 | SPIN4    |
| A_33_P3290955 | 5568.64  | 9146.74  | 0.71 | 5.3543 | 0.0033     | 0.3095 | KIAA1875 |
| A_23_P353316  | 31.74    | 50.36    | 0.71 | 5.2575 | 0.0036     | 0.311  | SMURF1   |
| A_33_P3328619 | 6678.08  | 11020.05 | 0.71 | 4.7319 | 0.0056     | 0.3294 |          |
| A_23_P215744  | 91.56    | 144.62   | 0.71 | 6.3883 | 0.0016     | 0.2733 | CTTNBP2  |
| A_23_P25566   | 4726.99  | 7713.17  | 0.71 | 6.3212 | 0.0016     | 0.2733 | GPR183   |
| A_33_P3258988 | 17.45    | 29.52    | 0.71 | 4.9046 | 0.0048     | 0.3196 | GDI2     |
| A_23_P166508  | 549.11   | 889.84   | 0.70 | 5.2813 | 0.0035     | 0.311  |          |
| A_33_P3236177 | 703.17   | 1139.93  | 0.70 | 7.9894 | 6.0000E-04 | 0.2193 | ANG      |
| A_24_P261383  | 202.16   | 310.89   | 0.70 | 4.2333 | 0.0088     | 0.3318 | TAF1D    |
| A_23_P85716   | 2690.03  | 4201.95  | 0.69 | 6.8414 | 0.0011     | 0.2668 | FCGR2A   |
| A_23_P371011  | 48.04    | 75.06    | 0.69 | 5.4183 | 0.0032     | 0.3095 | ZNF227   |
| A_24_P54131   | 247.63   | 380.98   | 0.69 | 4.5339 | 0.0067     | 0.3315 | DCLRE1B  |
| A_23_P99625   | 27.67    | 44.38    | 0.69 | 4.9355 | 0.0047     | 0.3196 | FITM1    |
| A_33_P3351775 | 79.06    | 130.10   | 0.69 | 7.4673 | 8.0000E-04 | 0.2392 |          |
| A_24_P342807  | 23.75    | 39.53    | 0.69 | 5.9989 | 0.0021     | 0.2918 | SLC30A6  |
| A_32_P87697   | 29475.87 | 46802.86 | 0.68 | 7.3421 | 8.0000E-04 | 0.2392 | HLA-DRA  |
| A_24_P313418  | 68.68    | 118.09   | 0.68 | 5.7423 | 0.0025     | 0.298  | CCL22    |
| A_24_P237586  | 275.01   | 447.66   | 0.68 | 5.0103 | 0.0044     | 0.3173 | ANKRD37  |

|               |          |          |       |         |            |        |            |
|---------------|----------|----------|-------|---------|------------|--------|------------|
| A_33_P3263666 | 2204.73  | 3570.41  | 0.68  | 4.4619  | 0.0071     | 0.3315 | ANKRD9     |
| A_23_P110196  | 173.85   | 287.18   | 0.68  | 5.9138  | 0.0022     | 0.2918 | HERC5      |
| A_33_P3295333 | 26.76    | 42.54    | 0.68  | 5.155   | 0.0039     | 0.3134 | CLEC1A     |
| A_33_P3236392 | 249.82   | 382.87   | 0.67  | 5.8762  | 0.0022     | 0.2918 | PVRL4      |
| A_23_P2745    | 17.93    | 29.77    | 0.67  | 5.7744  | 0.0024     | 0.2953 | GJB6       |
| A_23_P402319  | 337.02   | 507.54   | 0.67  | 5.1038  | 0.0041     | 0.3145 | GAPT       |
| A_24_P477051  | 23.51    | 37.44    | 0.67  | 6.1669  | 0.0018     | 0.2816 |            |
| A_24_P288993  | 162.96   | 270.55   | 0.66  | 4.2925  | 0.0083     | 0.3318 |            |
| A_33_P3386132 | 397.26   | 623.42   | 0.66  | 6.3502  | 0.0016     | 0.2733 | C2orf49    |
| A_23_P10077   | 443.79   | 705.56   | 0.66  | 6.2905  | 0.0017     | 0.2733 | PNPLA2     |
| A_24_P22079   | 225.45   | 352.04   | 0.66  | 5.9146  | 0.0022     | 0.2918 | FOXO1      |
| A_23_P57760   | 101.41   | 159.07   | 0.66  | 7.4768  | 8.0000E-04 | 0.2392 | ACPL2      |
| A_24_P212819  | 3107.33  | 4788.86  | 0.65  | 6.2808  | 0.0017     | 0.2733 |            |
| A_24_P390060  | 219.39   | 346.68   | 0.65  | 5.6028  | 0.0028     | 0.3038 | IQCD       |
| A_24_P195724  | 1585.50  | 2347.11  | 0.65  | 4.3066  | 0.0082     | 0.3318 |            |
| A_23_P24044   | 47.34    | 73.82    | 0.65  | 7.3834  | 8.0000E-04 | 0.2392 | CNNM2      |
| A_23_P37359   | 168.99   | 253.57   | 0.65  | 5.0175  | 0.0044     | 0.3173 | CIDEB      |
| A_23_P49499   | 279.35   | 414.74   | 0.65  | 4.651   | 0.006      | 0.3294 | ST6GALNAC2 |
| A_23_P82128   | 17218.41 | 26359.21 | 0.64  | 5.9828  | 0.0021     | 0.2918 | RPS12      |
| A_33_P3234472 | 60.21    | 97.99    | 0.64  | 5.1275  | 0.004      | 0.3145 | LOC284751  |
| A_33_P3417589 | 25.18    | 40.08    | 0.64  | 4.3282  | 0.0081     | 0.3318 |            |
| A_33_P3352098 | 11435.65 | 17831.64 | 0.64  | 6.7192  | 0.0012     | 0.2692 | MS4A7      |
| A_23_P60166   | 395.34   | 627.24   | 0.64  | 6.3945  | 0.0016     | 0.2733 | DEPTOR     |
| A_33_P3284883 | 48.11    | 74.30    | 0.64  | 6.3034  | 0.0017     | 0.2733 | MOB3B      |
| A_24_P110273  | 676.36   | 1044.92  | 0.63  | 6.3217  | 0.0016     | 0.2733 |            |
| A_33_P3327799 | 3260.03  | 5077.60  | 0.63  | 5.9058  | 0.0022     | 0.2918 |            |
| A_23_P26024   | 4892.64  | 7101.14  | 0.63  | 4.5079  | 0.0068     | 0.3315 | C15orf48   |
| A_33_P3272090 | 154.84   | 239.22   | 0.63  | 4.7594  | 0.0055     | 0.3288 | PDE4DIP    |
| A_33_P3295650 | 61.03    | 95.87    | 0.62  | 5.5974  | 0.0028     | 0.3038 | APBA1      |
| A_32_P135818  | 7584.21  | 11366.12 | 0.62  | 5.2381  | 0.0037     | 0.3121 | RPS3A      |
| A_23_P217428  | 62.29    | 97.58    | 0.62  | 5.0527  | 0.0043     | 0.3168 | ARHGAP6    |
| A_24_P332341  | 227.80   | 367.39   | 0.62  | 4.3021  | 0.0082     | 0.3318 | POLR2J4    |
| A_33_P3382031 | 70.26    | 108.03   | 0.62  | 6.2503  | 0.0017     | 0.2736 | TMEM236    |
| A_23_P9883    | 1124.10  | 1674.39  | 0.62  | 5.326   | 0.0034     | 0.3095 | NLRP3      |
| A_23_P41114   | 878.89   | 1323.40  | 0.62  | 6.4491  | 0.0015     | 0.2733 | CSTA       |
| A_23_P55020   | 656.97   | 1013.28  | 0.61  | 6.659   | 0.0013     | 0.2725 | CD300LF    |
| A_23_P422851  | 605.75   | 902.87   | 0.61  | 5.8119  | 0.0024     | 0.2918 | CABLES1    |
| A_23_P140848  | 324.38   | 493.00   | 0.61  | 4.9716  | 0.0046     | 0.3196 | MPHOSPH6   |
| A_24_P63136   | 107.12   | 161.75   | 0.61  | 6.2917  | 0.0017     | 0.2733 | P2RY13     |
| A_24_P363548  | 31.41    | 47.43    | 0.61  | 6.2105  | 0.0018     | 0.2772 | HIP1       |
| A_23_P70398   | 47.75    | 70.80    | 0.61  | 4.3648  | 0.0078     | 0.3318 | VEGFA      |
| A_33_P3216427 | 523.77   | 813.73   | 0.61  | 4.8868  | 0.0049     | 0.3196 | DGKQ       |
| A_33_P3367994 | 385.69   | 568.55   | 0.60  | 5.8335  | 0.0023     | 0.2918 | TAF8       |
| A_24_P48408   | 98.56    | 142.17   | 0.60  | 4.5112  | 0.0068     | 0.3315 | RNMT       |
| A_32_P217750  | 49.31    | 78.60    | 0.60  | 4.2311  | 0.0088     | 0.3318 | IL3RA      |
| A_33_P3315320 | 70.38    | 106.96   | 0.60  | 6.7149  | 0.0012     | 0.2692 | CNTD1      |
| A_23_P64343   | 2067.77  | 3068.07  | 0.60  | 5.7079  | 0.0025     | 0.3005 | TIMM10     |
| A_23_P343398  | 58.18    | 85.73    | 0.60  | 5.3014  | 0.0035     | 0.3105 | CCR7       |
| A_23_P62967   | 1743.65  | 1144.21  | -0.60 | -6.7737 | 0.0012     | 0.2689 | DISC1      |
| A_33_P3317168 | 418.46   | 276.28   | -0.60 | -4.5822 | 0.0064     | 0.3315 | EPS8L3     |
| A_23_P372096  | 49.48    | 33.26    | -0.60 | -4.1053 | 0.0099     | 0.3318 | C20orf112  |
| A_23_P18119   | 83.37    | 52.02    | -0.61 | -4.2356 | 0.0088     | 0.3318 | IMPG2      |
| A_23_P125204  | 492.06   | 317.00   | -0.61 | -6.4729 | 0.0015     | 0.2733 | OR10G8     |



|               |          |          |       |         |            |        |              |
|---------------|----------|----------|-------|---------|------------|--------|--------------|
| A 33 P3371109 | 51.32    | 33.28    | -0.62 | -5.701  | 0.0026     | 0.3005 | LOC100130597 |
| A 33 P3404097 | 2144.26  | 1411.17  | -0.63 | -5.0479 | 0.0043     | 0.3169 | PGM5P2       |
| A 33 P3380850 | 47.45    | 30.57    | -0.63 | -7.2047 | 9.0000E-04 | 0.2392 | PAX2         |
| A 24 P376787  | 499.87   | 337.10   | -0.64 | -4.73   | 0.0056     | 0.3294 | ZNF496       |
| A 23 P146284  | 2607.18  | 1715.24  | -0.64 | -4.2267 | 0.0088     | 0.3318 | SQLE         |
| A 33 P3315824 | 105.26   | 67.94    | -0.64 | -4.5628 | 0.0065     | 0.3315 |              |
| A 33 P3381827 | 432.23   | 287.12   | -0.65 | -4.5535 | 0.0066     | 0.3315 | OSBPL2       |
| A 32 P134290  | 1591.48  | 1022.82  | -0.65 | -6.7639 | 0.0012     | 0.2689 | ZCCHC2       |
| A 23 P150903  | 261.74   | 167.82   | -0.65 | -5.3154 | 0.0035     | 0.3095 | FAR2         |
| A 33 P3297978 | 21265.37 | 13729.91 | -0.65 | -5.547  | 0.0029     | 0.3038 | MYO1E        |
| A 24 P587443  | 38.51    | 23.78    | -0.66 | -4.2511 | 0.0086     | 0.3318 |              |
| A 23 P340848  | 1536.35  | 979.80   | -0.67 | -7.0574 | 0.001      | 0.246  | PTGIR        |
| A 23 P48784   | 34.89    | 21.22    | -0.67 | -4.8737 | 0.005      | 0.3196 | CYP46A1      |
| A 33 P3310296 | 406.56   | 256.02   | -0.67 | -5.7208 | 0.0025     | 0.2994 |              |
| A 33 P3242039 | 594.73   | 354.94   | -0.67 | -4.1768 | 0.0093     | 0.3318 |              |
| A 23 P500400  | 118.89   | 76.68    | -0.67 | -4.5846 | 0.0064     | 0.3315 | ABCA6        |
| A 23 P32006   | 45.87    | 28.63    | -0.68 | -7.1463 | 9.0000E-04 | 0.2435 | OR13D1       |
| A 33 P3324786 | 283.86   | 169.49   | -0.69 | -4.8484 | 0.0051     | 0.3212 |              |
| A 23 P250619  | 2274.92  | 1342.70  | -0.72 | -5.3412 | 0.0034     | 0.3095 | ZDHHC14      |
| A 33 P3281468 | 55.49    | 33.39    | -0.73 | -4.8617 | 0.005      | 0.3197 | STARD9       |
| A 33 P3397348 | 136.33   | 80.84    | -0.73 | -4.7319 | 0.0056     | 0.3294 | LOC149134    |
| A 33 P3512350 | 675.48   | 399.65   | -0.76 | -6.9789 | 0.0011     | 0.2531 | LOC339807    |
| A 33 P3214314 | 1141.14  | 713.42   | -0.76 | -4.3225 | 0.0081     | 0.3318 | CCSER2       |
| A 23 P81441   | 1493.93  | 874.24   | -0.76 | -8.7105 | 4.0000E-04 | 0.2138 | C5orf20      |
| A 23 P328545  | 440.40   | 259.98   | -0.76 | -8.0807 | 5.0000E-04 | 0.2193 | GABRP        |
| A 33 P3274134 | 777.16   | 461.18   | -0.77 | -4.3718 | 0.0077     | 0.3318 | TMEM151B     |
| A 33 P3232955 | 920.03   | 555.00   | -0.77 | -6.662  | 0.0013     | 0.2725 | F2RL3        |
| A 33 P3263867 | 5610.72  | 3207.27  | -0.79 | -4.7778 | 0.0054     | 0.3285 | P2RX7        |
| A 23 P97394   | 1334.01  | 788.36   | -0.80 | -5.3565 | 0.0033     | 0.3095 | BCAR3        |
| A 33 P3380383 | 4374.93  | 2579.19  | -0.81 | -8.8739 | 4.0000E-04 | 0.2138 | TIFAB        |
| A 23 P58009   | 32.28    | 18.15    | -0.82 | -8.8114 | 4.0000E-04 | 0.2138 | C3orf52      |
| A 23 P34345   | 116.89   | 68.07    | -0.83 | -4.8014 | 0.0053     | 0.3267 | VCAM1        |
| A 23 P91095   | 523.44   | 291.00   | -0.84 | -9.6298 | 2.0000E-04 | 0.2138 | CD28         |
| A 23 P103034  | 214.84   | 114.56   | -0.91 | -7.2742 | 9.0000E-04 | 0.2392 | CRYBA4       |
| A 23 P67896   | 269.49   | 137.51   | -0.92 | -6.3894 | 0.0016     | 0.2733 | SCN3A        |
| A 33 P3393655 | 103.21   | 52.60    | -0.93 | -5.5633 | 0.0028     | 0.3038 | LGI2         |
| A 23 P390116  | 389.38   | 221.87   | -0.98 | -4.4755 | 0.007      | 0.3315 | SPATA13      |
| A 32 P155666  | 716.76   | 350.13   | -1.07 | -9.703  | 2.0000E-04 | 0.2138 | ECEL1        |
| A 23 P404162  | 100.99   | 46.26    | -1.08 | -8.2829 | 5.0000E-04 | 0.2193 | HDAC9        |
| A 33 P3304998 | 197.28   | 94.61    | -1.09 | -4.7524 | 0.0055     | 0.3291 | LOC101930176 |
| A 24 P41706   | 77.88    | 21.11    | -1.81 | -7.2246 | 9.0000E-04 | 0.2392 | OFCC1        |

## SUPPLEMENTARY FIGURES

**Supplementary Figure 1. Lack of effect of 5-HT<sub>2</sub>BR blockade on the inhibitory effect of 5-HT on the LPS-induced TNF $\alpha$  production.** Production of LPS-stimulated TNF $\alpha$  by M-M $\emptyset$  non-treated or pretreated with 5-HT (6 h) in the presence or absence of the 5-HT<sub>7</sub>R antagonist SB269970 (10  $\mu$ M) or the 5-HT<sub>2</sub>BR antagonist SB204741 (10  $\mu$ M) (n=3; \*, p < 0.05; \*\*, p < 0.01; ns, non-significant ).

**Supplementary Figure 2. GSEA Hallmark gene sets significantly regulated upon M-M $\emptyset$  exposure to 5-HT.** Results of GSEA on the “t statistic-ranked” list of genes obtained from the 5-HT-treated M-M $\emptyset$  versus M-M $\emptyset$  limma analysis, and using the “Hallmark gene sets” contained in the Molecular Signature databases available at the GSEA website. The gene sets significantly upregulated or down-regulated in the transcriptome of 5HT-treated M-M $\emptyset$  are shown. The False Discovery Rate (FDR q-val) for each GSEA is indicated.

**Supplementary Figure 3. Htr7 mRNA expression in *ex vivo*-isolated and *in vitro*-generated mouse macrophages.** A. Relative expression of the Htr7 mRNA and Htr7 splicing isoforms (a,b,c) in mouse liver cells (Hep, Hepatocytes; KC, Kupffer Cells; SEC, Sinusoidal Endothelial Cells) and mouse peritoneal F4/80<sup>+</sup> (n=3, \*, p < 0.05). B. Relative expression of the Htr7 mRNA and Htr7 splicing isoforms (a,b,c) in mouse bone marrow-derived GM-M $\emptyset$  and M-M $\emptyset$  (n=3). C. Relative Htr7 mRNA expression in untreated (-) or LPS-stimulated mouse bone marrow-derived GM-M $\emptyset$  (upper panel) and peritoneal F4/80<sup>+</sup> cells (lower panel). Two independent experiments were performed and both are shown. In all cases (A-C), results are expressed as the Htr7 mRNA level relative to the Tbp mRNA level in the same sample.

**Supplementary Table I. Gene expression analysis on untreated or 5-HT-treated (10  $\mu$ M, 6h) M-MØ.** List of 170 upregulated annotated genes ( $p < 0.01$ ;  $\log_2$  ratio 5-HT/untreated  $\geq 0.6$ ) and 41 downregulated genes ( $p < 0.01$ ;  $\log_2$  ratio 5-HT/untreated  $\leq -0.6$ ).
